# Supplementary material for: Effects of Vitamin A on Yanbian Yellow Cattle and Their Preadipocytes by Activating AKT/mTOR Signaling Pathway and Intestinal Microflora
Source: MDPI journal article supplement (doi:10.3390/ani12121477), 2022-06-07
Supplement: s1 [file s1]

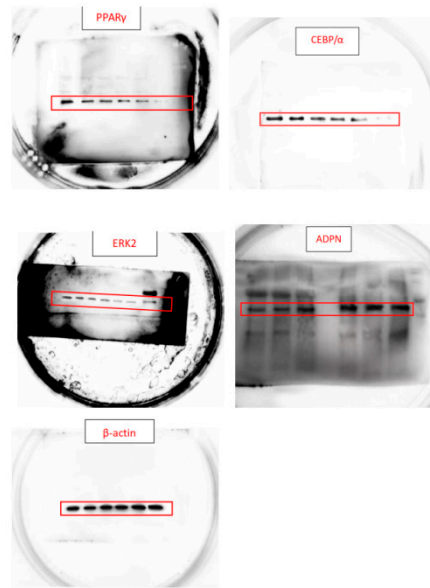

**Figure S1.** Original Western blot figures of PPAR $\gamma$ , C/EBP $\alpha$ , ERK2, and ADPN in bovine adipocytes treated with ATRA.

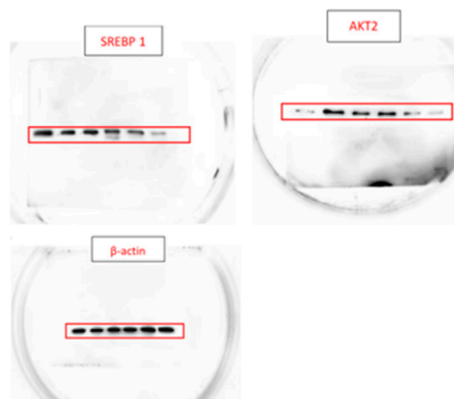

**Figure S2.** Original Western blot figures of SREBP1 and AKT2 in bovine adipocytes treated with ATRA.

**Table S1.** Image J analysis of grayscale values.

| GENE<br>mol/L     | 0      | 2×10 <sup>-7</sup> | 1×10 <sup>-6</sup> | 2×10 <sup>-6</sup> | 1×10 <sup>-5</sup> | 2×10 <sup>-5</sup> |
|-------------------|--------|--------------------|--------------------|--------------------|--------------------|--------------------|
| ADPN              | 73,455 | 75,997             | 82,773             | 82,810             | 82,846             | 83,065             |
| AKT2              | 36,202 | 30,359             | 25,578             | 13,926             | 6280               | 4433               |
| CEBP/α            | 38,659 | 25,664             | 25,455             | 20,296             | 19,516             | 9123               |
| ERK2              | 49,245 | 32,330             | 24,829             | 21,681             | 12,689             | 13,751             |
| PPAR <sub>γ</sub> | 77,768 | 64,919             | 48,210             | 43,268             | 34,658             | 4188               |
| SREBP 1           | 45,050 | 42,438             | 41,284             | 39,835             | 33,890             | 13,593             |
| β-actin           | 29,899 | 28,914             | 31,077             | 32,454             | 35,458             | 35,857             |
